# Supplementary material for: Changes in Lipoprotein Particles in the Blood Serum of Patients with Lichen Planus
Source: MDPI journal article supplement (doi:10.3390/metabo13010091), 2023-01-06
Supplement: s1 [file s1]

Table S1. Diagnosed metabolic and cardiovascular comorbidities of LP patients and HC.

| Diagnosis                     | Number of LP patients (%) | Number of HC (%) |
|-------------------------------|---------------------------|------------------|
| <b>Cardiovascular</b>         |                           |                  |
| Hypertension                  | 16 (50)                   | 13 (40.6)        |
| Atherosclerosis               | 2 (6.3)                   | 1 (3.1)          |
| Stenocardia                   | 1 (3.1)                   |                  |
| Congestive heart failure      | 1 (3.1)                   | 1 (3.1)          |
| Atrial fibrillation           | 1 (3.1)                   |                  |
| <b>Metabolic</b>              |                           |                  |
| Type 2 diabetes               | 2 (6.3)                   | 3 (9.4)          |
| Hypothyroidism                | 4 (12.5)                  |                  |
| Pure hypercholesterolemia     |                           | 1 (3.1)          |
| <b>Infectious</b>             |                           |                  |
| Chronic hepatitis C infection | 2 (6.3)                   |                  |

Table S2. Metabolite and lipoprotein particle concentrations that did not differ statistically significantly between blood serum samples obtained from patients suffering from LP, and HC, but had a trend toward alterations ( $p < 0.05$ ).

| Metabolites and lipoprotein particles | Mean for LP | Mean for HC | Wilcox-test LP vs. HC, $p < 0.05$ |
|---------------------------------------|-------------|-------------|-----------------------------------|
| <b>Very small VLDL</b>                |             |             |                                   |
| XS-VLDL-CE                            | 0.38        | -0.37       | 0.0048                            |
| XS-VLDL-C                             | 0.36        | -0.35       | 0.0086                            |
| XS-VLDL-P                             | 0.19        | -0.31       | 0.0309                            |
| XS-VLDL-L                             | 0.19        | -0.31       | 0.0388                            |
| XS-VLDL-FC                            | 0.19        | -0.31       | 0.0388                            |
| <b>Small VLDL</b>                     |             |             |                                   |
| S-VLDL-FC                             | 0.32        | -0.31       | 0.0148                            |
| S-VLDL-PL                             | 0.31        | -0.3        | 0.0206                            |
| S-VLDL-C                              | 0.3         | -0.29       | 0.0313                            |
| S-VLDL-L                              | 0.28        | -0.27       | 0.0323                            |
| S-VLDL-P                              | 0.26        | -0.26       | 0.0369                            |
| S-VLDL-CE                             | 0.28        | -0.27       | 0.0478                            |
| <b>Medium VLDL</b>                    |             |             |                                   |
| M-VLDL-FC                             | 0.34        | -0.33       | 0.0062                            |
| M-VLDL-CE                             | 0.36        | -0.35       | 0.0064                            |
| M-VLDL-C                              | 0.36        | -0.35       | 0.0076                            |
| M-VLDL-PL                             | 0.32        | -0.31       | 0.0127                            |
| M-VLDL-P                              | 0.31        | -0.3        | 0.0178                            |

|                                                                                 |      |       |        |
|---------------------------------------------------------------------------------|------|-------|--------|
| M-VLDL-L                                                                        | 0.3  | -0.29 | 0.0191 |
| <b>Large VLDL</b>                                                               |      |       |        |
| L-VLDL-CE                                                                       | 0.27 | -0.26 | 0.0382 |
| L-VLDL-C                                                                        | 0.25 | -0.24 | 0.0449 |
| <b>Very large VLDL</b>                                                          |      |       |        |
| XXL-VLDL-TG                                                                     | 0.11 | -0.29 | 0.0302 |
| XXL-VLDL-PL                                                                     | 0.11 | -0.28 | 0.0346 |
| XXL-VLDL-FC                                                                     | 0.12 | -0.29 | 0.0369 |
| XXL-VLDL-P                                                                      | 0.14 | -0.3  | 0.0394 |
| <b>VLDL</b>                                                                     |      |       |        |
| "XXL-VLDL-P" + "XL-VLDL-P" + "L-VLDL-P" + "M-VLDL-P" + "S-VLDL-P" + "XS-VLDL-P" | 0.3  | -0.29 | 0.0246 |
| <b>IDL</b>                                                                      |      |       |        |
| IDL-L                                                                           | 0.39 | -0.38 | 0.0029 |
| IDL-P                                                                           | 0.35 | -0.34 | 0.01   |
| <b>LDL</b>                                                                      |      |       |        |
| LDL-CE                                                                          | 0.38 | -0.37 | 0.0029 |
| LDL-P                                                                           | 0.35 | -0.34 | 0.0093 |
| LDL-PL                                                                          | 0.37 | -0.36 | 0.0037 |
| "L-LDL-P" + "M-LDL-P" + "S-LDL-P"                                               | 0.35 | -0.34 | 0.0093 |
| <b>Small LDL</b>                                                                |      |       |        |
| S-LDL-FC                                                                        | 0.33 | -0.32 | 0.0076 |
| S-LDL-C                                                                         | 0.32 | -0.31 | 0.0153 |
| S-LDL-P                                                                         | 0.31 | -0.3  | 0.0185 |
| S-LDL-PL                                                                        | 0.29 | -0.28 | 0.0185 |
| S-LDL-CE                                                                        | 0.31 | -0.3  | 0.0191 |
| S-LDL-L                                                                         | 0.31 | -0.3  | 0.0206 |
| <b>Medium LDL</b>                                                               |      |       |        |
| M-LDL-FC                                                                        | 0.37 | -0.36 | 0.0029 |
| M-LDL-L                                                                         | 0.34 | -0.33 | 0.0109 |
| M-LDL-C                                                                         | 0.33 | -0.32 | 0.0109 |
| M-LDL-PL                                                                        | 0.34 | -0.33 | 0.0127 |
| M-LDL-CE                                                                        | 0.32 | -0.31 | 0.0165 |
| M-LDL-P                                                                         | 0.26 | -0.25 | 0.0394 |
| <b>Large LDL</b>                                                                |      |       |        |
| L-LDL-P                                                                         | 0.38 | -0.37 | 0.0042 |

|                                                |      |       |        |
|------------------------------------------------|------|-------|--------|
| <b>Small HDL</b>                               |      |       |        |
| S-HDL-FC                                       | 0.34 | -0.33 | 0.0052 |
| S-HDL-PL                                       | 0.28 | -0.27 | 0.0097 |
| S-HDL-L                                        | 0.3  | -0.29 | 0.0153 |
| S-HDL-P                                        | 0.3  | -0.3  | 0.0178 |
| S-HDL-C                                        | 0.28 | -0.27 | 0.0246 |
| <b>Medium HDL</b>                              |      |       |        |
| M-HDL-TG                                       | 0.28 | -0.28 | 0.0357 |
| <b>HDL</b>                                     |      |       |        |
| "XL-HDL-P" + "L-HDL-P" + "M-HDL-P" + "S-HDL-P" | 0.24 | -0.23 | 0.0263 |
| <b>Cholesterol</b>                             |      |       |        |
| non-HDL-C                                      | 0.39 | -0.38 | 0.0034 |
| Remnant cholesterol                            | 0.38 | -0.37 | 0.0048 |
| VLDL-C                                         | 0.32 | -0.31 | 0.0159 |
| <b>Total lipids</b>                            |      |       |        |
| Total-L                                        | 0.39 | -0.38 | 0.0035 |
| VLDL-L                                         | 0.25 | -0.25 | 0.0302 |
| <b>Phospholipids</b>                           |      |       |        |
| Total-PL                                       | 0.38 | -0.36 | 0.0067 |
| VLDL-PL                                        | 0.28 | -0.27 | 0.0292 |
| <b>Cholesteryl esters</b>                      |      |       |        |
| VLDL-CE                                        | 0.33 | -0.32 | 0.0117 |
| <b>Free cholesterol</b>                        |      |       |        |
| VLDL-FC                                        | 0.3  | -0.29 | 0.0171 |
| <b>Lipoprotein particle concentrations</b>     |      |       |        |
| Total concentration of lipoprotein particles   | 0.29 | -0.28 | 0.0113 |
| Concentration of VLDL particles                | 0.3  | -0.29 | 0.0246 |
| Concentration of HDL particles                 | 0.24 | -0.23 | 0.0263 |
| <b>Other lipids</b>                            |      |       |        |
| Cholines                                       | 0.35 | -0.34 | 0.0064 |
| Phosphoglycerides                              | 0.35 | -0.34 | 0.0057 |
| Phosphatidylcholines                           | 0.34 | -0.33 | 0.0086 |
| Sphingomyelins                                 | 0.29 | -0.28 | 0.0206 |
| <b>Apolipoproteins</b>                         |      |       |        |
| Apolipoprotein B                               | 0.35 | -0.34 | 0.0073 |

|                                                   |       |       |        |
|---------------------------------------------------|-------|-------|--------|
| <b>Fatty acids</b>                                |       |       |        |
| Polyunsaturated fatty acids                       | 0.35  | -0.34 | 0.007  |
| Saturated fatty acids                             | 0.34  | -0.33 | 0.0086 |
| Total fatty acids                                 | 0.33  | -0.32 | 0.0093 |
| Omega-6 fatty acids                               | 0.35  | -0.33 | 0.01   |
| Linoleic acid                                     | 0.32  | -0.31 | 0.0229 |
| Omega-3 fatty acids                               | 0.12  | -0.24 | 0.0261 |
| <b>Branched-chain amino acids</b>                 |       |       |        |
| Leucine                                           | 0.15  | -0.14 | 0.0478 |
| <b>Fluid balance</b>                              |       |       |        |
| Albumin                                           | 0.33  | -0.32 | 0.0037 |
| <b>Relative lipoprotein lipid concentrations</b>  |       |       |        |
| Cholesterol to total lipids ratio in L-LDL        | 0.33  | -0.32 | 0.0097 |
| Cholesteryl esters to total lipids ratio in L-LDL | 0.32  | -0.31 | 0.0153 |
| Phospholipids to total lipids ratio in L-LDL      | -0.3  | 0.29  | 0.0221 |
| Cholesterol to total lipids ratio in L-HDL        | -0.24 | 0.23  | 0.0421 |

C – cholesterol; CE – cholesteryl esters; FC – free cholesterol; HC – healthy controls; IDL – intermediate-density lipoprotein; L- – large; -L – total lipids; LDL – low-density lipoprotein; LP – lichen planus; M- – medium; -P – particles; PL – phospholipids; S- – small; XL- – very large; XS- – very small; XXL- – extremely large.

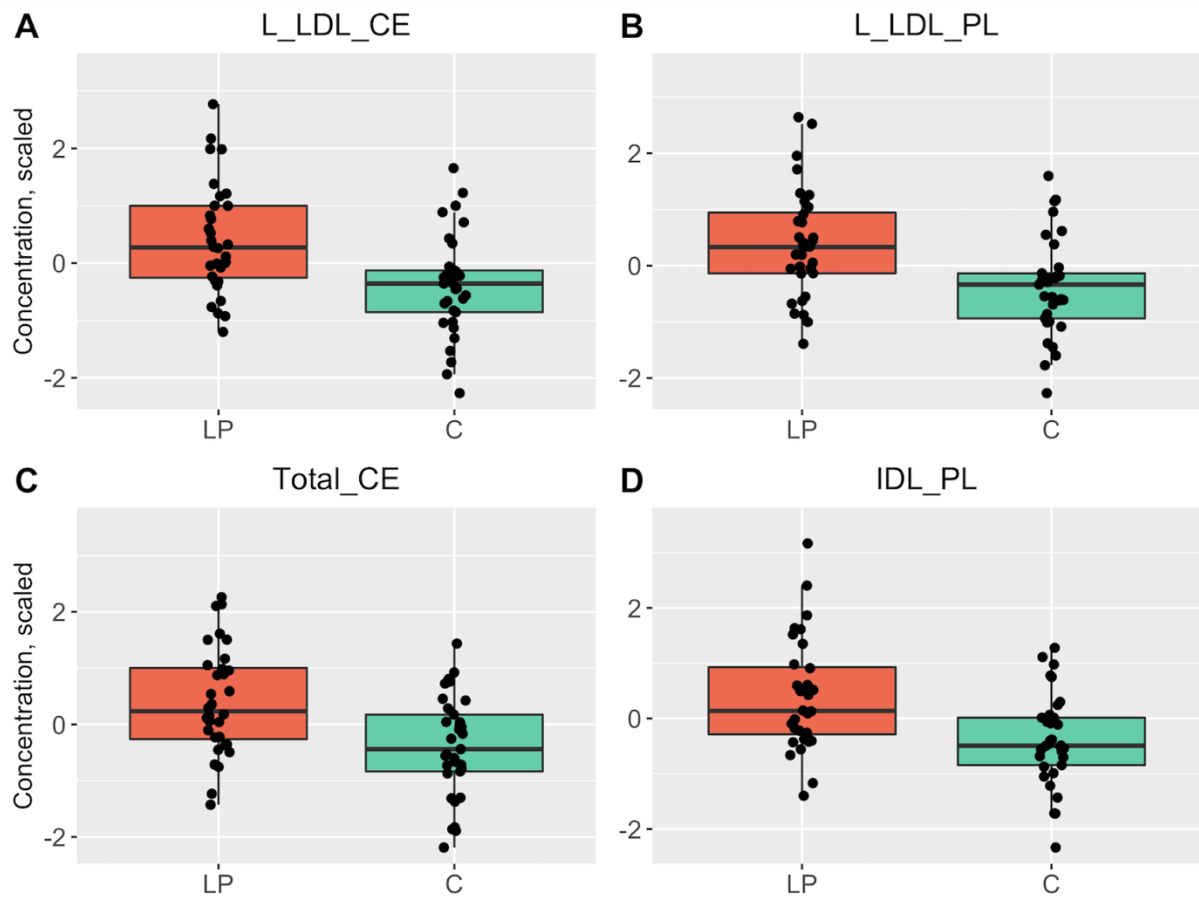

Figure S1. Boxplots of the metabolites and lipoprotein particles that had statistically significant differences between the blood samples of LP patients and HC.

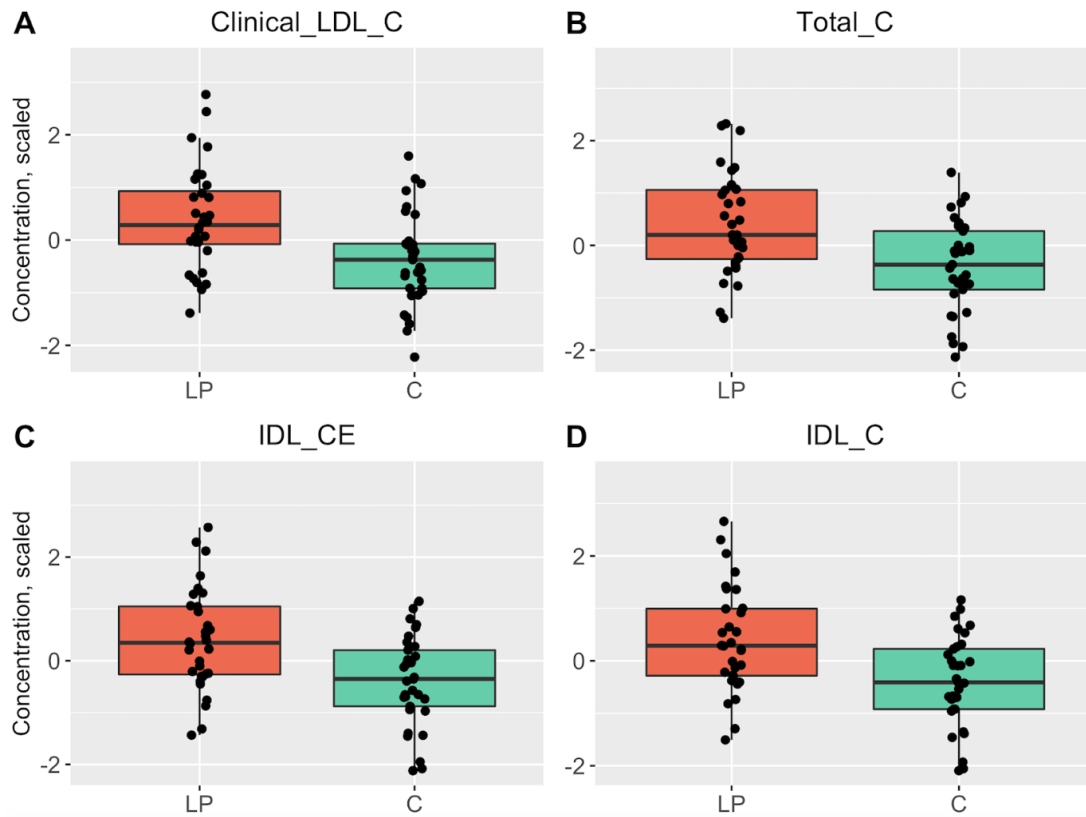

Figure S2. Boxplots of the metabolites and lipoprotein particles that had statistically significant differences between the blood samples of LP patients and HC.

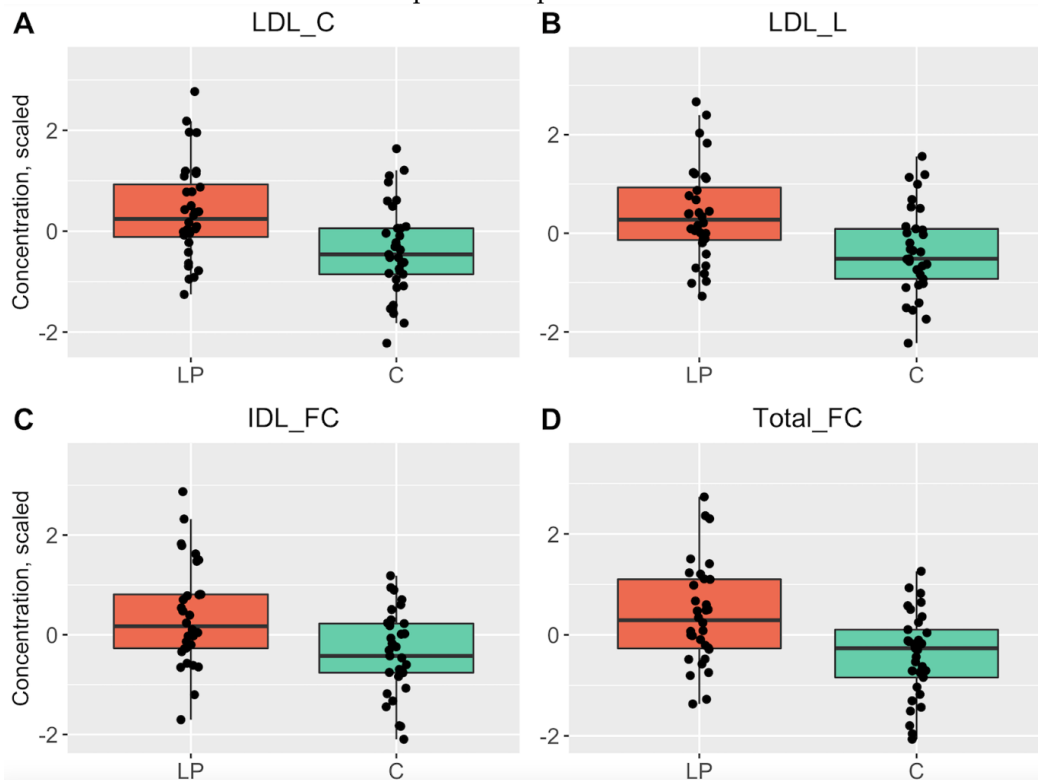

Figure S3. Boxplots of the metabolites and lipoprotein particles that had statistically significant differences between the blood samples of LP patients and HC.
